# Supplementary material
Source: publisher figshare collection journal article supplement (https://gsapubs.figshare.com/ndownloader/files/30804244)
Supplement: Supplementary file 1 [file 30804244]

## Sheet: geochem-Fig.2
LOI	6.28	5.12	11	7.47	8.39	8.97	6.5	5.35	7.02	9.97
100-LOI	93.72	94.88	89	92.53	91.61	91.03	93.5	94.65	92.98	90.03																				AUS/TAM				AUS/DSS						mizera16 (tables below)
	Loess Lingtai (below sample position in the profile)											Loess Lingtai - volatile-free basis											Badain Jaran Desert (BJD)				unmelted ejecta		AAMT	folco16		folco09		glass04,06		averaged				žák19 (average, n=12)
Sample	SL-1	SL-3	SL-5	SL-20	SL-30	SL-33	SL-37	SL-50	SL-65	SL-71	Sample	SL-1	SL-3	SL-5	SL-20	SL-30	SL-33	SL-37	SL-50	SL-65	SL-71		min	max			glass06			normal	high-Mg	normal	high-Mg	normal	high-Mg	normal	high-Mg			MN-AAT	SF-AAT	L-min	L-max	BJD-min	BJD-max	unmelted	AAMT-n	AAMT-Mg	UCC
SiO2	67.4369	65.8729	57.5546	59.5486							SiO2	71.9557	69.4276	64.668	64.356							SiO2	63.55	86.1	averaged	SiO2	66.1		SiO2	68.7	57.2	71.5	60.2	68.8	54.7	69.6667	57.3667		SiO2	78	73.6572	64.356	71.9557	63.55	86.1	66.1	69.6667	57.3667	66.6
TiO	0.719733	0.703069	0.58804	0.550209	0.628407	0.601034	0.692444	0.674762	0.646922	0.577114	TiO	0.767961	0.741009	0.660719	0.594627	0.685959	0.660259	0.740582	0.712903	0.695765	0.641024	TiO	0.16	0.745	zhao19a	TiO2	0.71		TiO2	0.96	1.09	0.89	0.98	0.81	0.92	0.886667	0.996667		TiO	0.624832	0.777108	0.594627	0.767961	0.16	0.745	0.71	0.886667	0.996667	0.64
Al2O3	15.1259	14.9819	12.534	12.2659	13.0631	12.5767	14.3481	14.6865	13.3624	12.3823	Al2O3	16.1394	15.7903	14.0832	13.2561	14.2595	13.816	15.3455	15.5166	14.3713	13.7535	Al2O3	6	12.3	&	Al2O3	17.7		Al2O3	16.8	19.7	15.5	16.4	15.2	17.4	15.8333	17.8333		Al2O3	10.6391	12.2737	13.2561	16.1394	6	12.3	17.7	15.8333	17.8333	15.4
FeO	4.87868	4.64763	3.83842	4.34504	4.29744	4.03705	4.7957	4.67014	4.15438	3.75646	FeO	5.20559	4.89843	4.31283	4.69582	4.69102	4.43486	5.12909	4.93412	4.46804	4.17246	FeO	0.907897	4.60662	hu16	FeO	5.3		FeO	4.06	4.19	4.09	4.81	5.37	6.02	4.50667	5.00667		FeO	3.80906	4.35154	4.17246	5.20559	0.907897	4.60662	5.3	4.50667	5.00667	5.04
MnO	0.106107	0.0986725	0.0812771	0.0810692	0.0906018	0.0861105	0.103694	0.0957399	0.089446	0.0834814	MnO	0.113217	0.103997	0.0913226	0.087614	0.0988994	0.0945958	0.110903	0.101152	0.0961992	0.0927262	MnO	0.0255	0.0775		MnO			MnO	0.09	0.11					0.09	0.11		MnO	0.0840158	0.0991369	0.087614	0.113217	0.0255	0.0775		0.09	0.11	0.1
MgO	1.78974	1.89684	1.98647	2.34212	2.2377	2.16557	1.96465	1.82866	1.92143	1.8719	MgO	1.90966	1.9992	2.23198	2.5312	2.44263	2.37897	2.10123	1.93202	2.0665	2.0792	MgO	0.405	3.01		MgO	2.16		MgO	3.41	10.5	3.08	12	3.17	15.4	3.22	12.6333		MgO	1.73732	2.21169	1.90966	2.5312	0.405	3.01	2.16	3.22	12.6333	2.48
CaO	1.41486	1.27011	9.4171	4.54065	6.94977	7.72142	2.46747	1.07364	5.55786	9.6488	CaO	1.50967	1.33865	10.581	4.90722	7.58626	8.48228	2.639	1.13433	5.97748	10.7173	CaO	0.96	5.685		CaO	3.44		CaO	3.77	5.97	3.47	5.14	3.28	4.82	3.50667	5.31		CaO	1.50608	2.41262	1.13433	10.7173	0.96	5.685	3.44	3.50667	5.31	3.59
Na2O	1.48815	1.50406	1.4283	1.56229	1.56269	1.49745	1.48492	1.3911	1.43423	1.36683	Na2O	1.58787	1.58522	1.60483	1.68841	1.70581	1.64501	1.58815	1.46973	1.54252	1.5182	Na2O	1.49	3.29		Na2O	1.65		Na2O	0.29	0.17	0.27	0.21	1.15	0.64	0.57	0.34		Na2O	1.33379	1.37425	1.46973	1.70581	1.49	3.29	1.65	0.57	0.34	3.27
K2O	2.50632	2.40959	2.11661	2.54933	2.3155	2.15034	2.54042	2.56584	2.34189	2.14348	K2O	2.67427	2.53962	2.37822	2.75514	2.52757	2.36224	2.71702	2.71087	2.5187	2.38085	K2O	1.505	2.485		K2O	2.93		K2O	0.92	0.2	0.98	0.29	2.2	0.11	1.36667	0.2		K2O	2.18309	2.77692	2.36224	2.75514	1.505	2.485	2.93	1.36667	0.2	2.8
Sc	14.011	13.426	11.124	12.581	12.333	11.602	13.584	13.303	12.376	11.164	Sc	14.9499	14.1505	12.4989	13.5967	13.4625	12.7452	14.5283	14.0549	13.3104	12.4003					Sc	17.9		Sc	16.7	20.8	18.4	20	15	21.7	16.7	20.8333		Sc	8.5062	11.5848	12.4003	14.9499	13.0968	24.8178	17.9	16.7	20.8333	14
V	101.2	100.84	84.83		86.681	81.371	100.76	97.906	91.22	83.046	V	107.981	106.282	95.3146		94.6196	89.3892	107.765	103.44	98.1071	92.2426	SiO2	54.4	85.2	zhao19a	V			V	33.5	38.6	28.5	38.8			31	38.7		V	71.4572	78.5523	89.3892	107.981	112.756	178.187		31	38.7	97
Cr	83.925	80.675	65.541	75.385	74.924	68.666	80.333	76.678	70.899	65.488	Cr	89.5487	85.0285	73.6416	81.4709	81.7858	75.4323	85.9176	81.0122	76.2519	72.7402	TiO	0.22	1		Cr	116		Cr	61.4	417.9	72.5	531.6	131	962	88.3	637.167		Cr	62.0368	76.3246	72.7402	89.5487	109.671	518.751	116	88.3	637.167	92
Co	15.277	14.308	11.962	13.673	13.241	12.428	14.981	14.042	12.957	11.512	Co	16.3007	15.0801	13.4404	14.7768	14.4537	13.6526	16.0225	14.8357	13.9353	12.7868	Al2O3	6.2	14		Co	24.1		Co	5.17	4.46	6.04	6.17	13.1	11	8.10333	7.21		Co	11.2255	12.2238	12.7868	16.3007	13.6207	24.5023	24.1	8.10333	7.21	17.3
Ni	51.679	31.972	31.154	31.075	44.184	34.744	37.503	43.972	41.413	30.164	Ni	55.1419	33.6973	35.0045	33.5837	48.2305	38.1676	40.1102	46.4575	44.5397	33.5044	FeO	0.97	6.1		Ni	83		Ni	5.2	11.57	6.01	15.77	41	44	17.4033	23.78		Ni	30.6295	22.4123	33.5044	55.1419	48.4791	93.5249	83	17.4033	23.78	47
Zn	78.057	74.877	65.042	74.955	76.286	68.88	84.194	73.747	71.425	64.248	Zn	83.2875	78.9176	73.0809	81.0062	83.2726	75.6674	90.0471	77.9155	76.8176	71.3629	MnO	0.031	0.085		Zn	135		Zn	2.95	2.27	1.72	3.77	14	8	6.22333	4.68		Zn	67.5923	19.2892	71.3629	90.0471	81.4983	154.401	135	6.22333	4.68	67
As	17.806	16.835	13.477	15.498	14.703	13.813	16.806	16.799	14.383	11.926	As	18.9991	17.7435	15.1427	16.7492	16.0496	15.1741	17.9743	17.7485	15.4689	13.2467	MgO	0.41	4.1		As	10.2		As										As	3.41015	0.809744	13.2467	18.9991	4.7	11.4	10.2			4.8
Br	9.6208	6.8633	3.8861	1.7198	0.66765	0.70496	1.5503	1.5862		0.50999	Br	10.2655	7.23366	4.3664	1.85864	0.728796	0.774426	1.65807	1.67586		0.566467	CaO	1.02	7.39		Br	1.2		Br										Br	1.28302	0.211667	0.566467	10.2655			1.2			1.6
Rb	117.73	110.23	94.851	104.94	108.8	100.13	118.47	109.66	101.65	93.152	Rb	125.619	116.178	106.574	113.412	118.764	109.997	126.706	115.858	109.325	103.468	Na2O	1.58	3.65		Rb	126		Rb	43	5	36	5	88	4	55.6667	4.66667		Rb	95.5117	110.068	103.468	126.706	64.8167	181.702	126	55.6667	4.66667	82
Sr	75.745	91.904	126.15	135.44	127.85	140.44	106.01	96.913	111.35	109.97	Sr	80.8205	96.8634	141.742	146.374	139.559	154.279	113.38	102.391	119.757	122.148	K2O	1.64	2.68		Sr			Sr	206	286	212	232	200	236	206	251.333		Sr	83.3343	147.154	80.8205	154.279	65.6114	185.669		206	251.333	320
Y	24.502	25.897	19.451	26.943	22.285	22.047	17.361	27.502	20.19	25.506	Y	26.1438	27.2945	21.8551	29.1181	24.3259	24.2195	18.5679	29.0565	21.7143	28.3306					Y			Y	33.07	40.49	34.9	36			33.985	38.245		Y	26.5	29.6908	18.5679	29.1181	20.1049	55.2087		33.985	38.245	21
Zr	286.41	282.49	238.93	247.95	245.75	251.59	258.23	281.44	276.02	243.21	Zr	305.602	297.734	268.461	267.967	268.257	276.381	276.182	297.348	296.86	270.143	SiO2	72.7	87	hu16	Zr	253		Zr	313	412	320	348	312	358	315	372.667		Zr	318	318.529	267.967	305.602	126.962	2506.68	253	315	372.667	193
Nb	17.019	16.966	14.611	16.794	14.555	14.466	17.695	14.307	16.174	14.214	Nb	18.1594	17.8815	16.4169	18.1498	15.888	15.8915	18.9251	15.1157	17.3951	15.7881	TiO	0.1	0.49		Nb			Nb	19.04	21.36	20.9	22.8			19.97	22.08		Nb	15.5	17.7831	15.1157	18.9251	12.2633	28.2002		19.97	22.08	12
Sb	1.5404	1.2508	1.2878	1.3102	1.4187	1.2301	1.4519	1.583	1.2091	1.3157	Sb	1.64362	1.3183	1.44697	1.41597	1.54863	1.35131	1.55283	1.67248	1.30039	1.4614	Al2O3	5.8	10.6		Sb	1.14												Sb	0.56356	0.219308	1.30039	1.67248	1.72299	3.29264	1.14			0.4
Cs	9.5827	8.8553	6.9343	8.4261	8.0519	7.5938	9.7307	8.9595	7.3259	6.4873	Cs	10.2248	9.33316	7.79135	9.10634	8.78932	8.34209	10.4072	9.46593	7.87901	7.20571	FeO	0.845794	3.11324		Cs	7.3		Cs	2.63	0.24	2.15	0.23	4.83	0.18	3.20333	0.216667		Cs	5.08463	6.55308	7.20571	10.4072	4.78732	15.372	7.3	3.20333	0.216667	4.9
Ba	554.91	495.34	468.12	514.22	479.8	457	530.31	524.78	463	445.25	Ba	592.093	522.07	525.978	555.733	523.742	502.032	567.176	554.443	497.957	494.557	MnO	0.02	0.07		Ba	364		Ba	496	606	519	496	447	560	487.333	554		Ba	370.42	429.015	494.557	592.093	325.212	590.692	364	487.333	554	628
La	38.864	36.837	31.906	36.218	34.746	32.537	37.819	36.865	34.485	32.231	La	41.4682	38.8248	35.8494	39.1419	37.9282	35.7432	40.4481	38.9488	37.0886	35.8003	MgO	0.4	1.92		La	53.2		La	54.12	67.49	52	50.6	47.8	56.8	51.3067	58.2967		La	33.1653	45.8923	35.7432	41.4682	33.2203	75.7253	53.2	51.3067	58.2967	31
Ce	77.65	73.737	63.277	70.34	70.246	66.641	77.229	73.939	66.738	62.386	Ce	82.8532	77.7161	71.0978	76.0186	76.6794	73.2077	82.5979	78.1183	71.7767	69.2947	CaO	0.9	3.98		Ce	104		Ce	103	114	101	97	94.5	95.3	99.5	102.1		Ce	62.5595	79.3108	69.2947	82.8532	76.1367	160.765	104	99.5	102.1	63
Nd	29.996	27.909	25.478	27.389	28.375	27.312	28.964	30.235	28.889	26.871	Nd	32.006	29.4151	28.627	29.6001	30.9737	30.0033	30.9775	31.944	31.0701	29.8467	Na2O	1.4	2.93		Nd	50.7		Nd	43.2	52.5	43.6	42.4	44	48.4	43.6	47.7667		Nd	25.8032	32.4631	28.627	32.006	29.1277	65.6287	50.7	43.6	47.7667	27
Sm	5.9655	6.1858	4.9519	5.9611	5.613	5.2957	6.0159	6.1805	5.5704	5.1616	Sm	6.36524	6.5196	5.56393	6.44234	6.12706	5.81753	6.43412	6.52985	5.99097	5.7332	K2O	1.37	2.29		Sm	8.9		Sm	8.3	x99.9	8.5	8.4	8.43	9.75	8.41	9.075		Sm	5.24837	6.39692	5.56393	6.52985	5.28158	12.5168	8.9	8.41	9.075	4.7
Eu	1.2931	1.2101	1.0638	1.1609	1.16	1.0697	1.2291	1.2506	1.1369	1.0515	Eu	1.37975	1.2754	1.19528	1.25462	1.26624	1.17511	1.31455	1.32129	1.22274	1.16794					Eu	1.56		Eu	1.67	1.94	1.62	1.68	1.55	1.89	1.61333	1.83667		Eu	1.00224	1.1788	1.16794	1.37975	0.97567	1.73314	1.56	1.61333	1.83667	1
Gd	6.2604	5.1346	5.5997	6.9517	5.9613	5.6631	6.3822	6.4873	6.1536	6.0658	Gd	6.6799	5.41168	6.2918	7.51291	6.50726	6.22114	6.82588	6.85399	6.6182	6.73753					Gd	8.27		Gd	6.72	8.43	7.29	6.99	7.25	8.86	7.08667	8.09333		Gd	5.53	5.66083	5.41168	7.51291	4.25734	10.5344	8.27	7.08667	8.09333	4
Tb	0.87585	0.86511	0.79082	0.87403	0.82192	0.78141	0.83473	0.87389	0.80423	0.73574	Tb	0.934539	0.911794	0.888562	0.944591	0.897195	0.858409	0.892759	0.923286	0.864949	0.817216					Tb	1.12		Tb	1.1	1.31	1.04	1.07	1.17	1.46	1.10333	1.28		Tb	0.647907	0.816246	0.817216	0.944591	0.66827	1.65253	1.12	1.10333	1.28	0.7
Dy	6.68	6.4538	5.5508	4.8339	5.5501	5.4714	6.0533	6.4751	5.9017	5.3076	Dy	7.12761	6.80207	6.23685	5.22414	6.0584	6.01055	6.47412	6.8411	6.34728	5.89537					Dy			Dy	6.28	7.84	6.82	6.85			6.55	7.345		Dy	5.49712	6.29615	5.22414	7.12761	3.962	9.9283		6.55	7.345	3.9
Ho	0.79316			0.90932	1.1342	1.2747	0.99938	0.90561	0.97182	0.90959	Ho	0.846308			0.98273	1.23807	1.40031	1.06886	0.956799	1.04519	1.01032					Ho			Ho	1.3	1.56	1.3	1.38			1.3	1.47		Ho	1.041	1.04862	0.846308	1.40031	0.80271	2.09281		1.3	1.47	0.83
Tm	0.56719	0.53804	0.47185	0.52559	0.52013	0.47725	0.5187	0.51298	0.50353	0.55477	Tm	0.605196	0.567074	0.530169	0.568021	0.567766	0.524278	0.554759	0.541976	0.541547	0.616206					Tm	0.58		Tm	0.51	0.63	0.557	0.551	0.58	0.68	0.549	0.620333		Tm	0.443	0.343333	0.524278	0.616206	0.3577	1.03402	0.58	0.549	0.620333	0.3
Yb	3.0119	2.807	2.4859	2.7773	2.7215	2.6417	2.7971	2.8233	2.7088	2.476	Yb	3.21372	2.95847	2.79315	3.00151	2.97075	2.90201	2.99155	2.98288	2.91331	2.75019					Yb	3.39		Yb	3.61	4.47	3.9	3.99	3.79	4.39	3.76667	4.28333		Yb	2.28523	2.70308	2.75019	3.21372	2.34304	7.04917	3.39	3.76667	4.28333	1.96
Lu	0.4758	0.44776	0.39364	0.44474	0.42084	0.39282	0.4401	0.46292	0.44672	0.39354	Lu	0.507682	0.471922	0.442292	0.480644	0.459382	0.431528	0.470695	0.489086	0.480447	0.437121					Lu	0.52		Lu	0.52	0.67	0.55	0.54	0.56	0.65	0.543333	0.62		Lu	0.380952	0.439846	0.431528	0.507682	0.35101	1.13187	0.52	0.543333	0.62	0.31
Hf	6.8359	6.7136	6.0192	6.05	6.1168	6.3005	6.363	7.0006	6.1045	5.5298	Hf	7.29396	7.07589	6.76315	6.53842	6.677	6.92134	6.80535	7.3963	6.56539	6.14217					Hf	5.53		Hf	8.4	11.21	8.53	10.01	8.72	10.85	8.55	10.69		Hf	7.57692	7.91554	6.14217	7.3963	3.62498	52.7049	5.53	8.55	10.69	5.3
Ta	1.0344	0.9971	0.88138	0.99554	0.95107	0.90211	1.0851	0.97638	0.93102	0.90027	Ta	1.10371	1.05091	0.990315	1.07591	1.03817	0.991003	1.16053	1.03157	1.00131	0.999967					Ta	1.64		Ta	1.36	1.67	1.81	2	1.66	1.96	1.61	1.87667		Ta	1.05012	1.25877	0.990315	1.16053	0.90175	2.17529	1.64	1.61	1.87667	0.9
W	2.3023		2.025		2.228	2.2953	2.30725	2.18655	2.06365	1.7441	W	2.45657		2.27528		2.43205	2.52148	2.46765	2.31014	2.21946	1.93724					W	2.4		W										W	1.82782	0.9475	1.93724	2.52148	1.95816	3.0211	2.4			1.9
Th	13.66	13.309	11.06	12.748	12.301	11.823	13.883	13.387	12.157	11.428	Th	14.5753	14.0272	12.427	13.7772	13.4276	12.988	14.8481	14.1437	13.0749	12.6935					Th	23.2		Th	18.7	23.4	19.4	19.5	16.6	20.1	18.2333	21		Th	11.1816	14.7998	12.427	14.8481	13.8846	32.6074	23.2	18.2333	21	10.5
U	2.198		2.251	2.7692	1.6956	2.7152	1.7149	1.5502	2.2128	2.2569	U	2.34528	0	2.52921	2.99276	1.85089	2.98275	1.83412	1.63782	2.37987	2.50683					U	3.47		U	0.69	0.5	0.492	0.49	1.98	0.58	1.054	0.523333		U	2.6682	2.58415	0	2.99276	2.60053	8.2322	3.47	1.054	0.523333	2.7
[truncated: 10 more columns]

## Sheet: Sr-Nd-Fig.3
Sample	eNd(0)	87Sr/86Sr	Ref	Note
Desert sand
Badain Jaran, BJ-04	-9.8	0.716868	chen07	silicate fraction (<75)
BJ-05	-7.4	0.713214		dtto
BJ-06	-10.2	0.717438		dtto
BJ-07	-8.3	0.714338		dtto
BJ-08	-9.9	0.716894		dtto
BJ-09	-8.4	0.715854		dtto
Surf-43	-9.4	0.716034		dtto
Surf-49	-9.2	0.716097		dtto
Surf-51	-9.6	0.717328		dtto
BDJL-01 (<75)	-10.9	0.71836		dtto
Tengger, TGL-10N	-10.6	0.717902		dtto
TGL-13N	-11.7	0.718556		dtto
TGL-16N	-10.4	0.719158		dtto
MQ-01 (<75)	-11.7	0.720709		dtto
AAT
Thailand A	-11.5	0.718894	shaw82
Thailand B	-11.8	0.7188
Cambodia A	-11.8	0.71857
Cambodia B	-11.2	0.71947
Cambodia C	-12.2	0.71912
HiCa Australite	-11.5	0.71398
X-102	-12.1	0.718405	blum92	low-silica MN indochinites
X-103	-10.9	0.718426		dtto
F-16	-12.2	0.719721		high-silica MN indochinites
8301	-11.4	0.720063		dtto
8319L	-12.1	0.720325		dtto
8319D	-11.2	0.719528		dtto
2537	-10.9	0.716533		australites
4831	-11.1	0.713491		dtto
W-1, Wenchang	-11.5643	0.716771	lee04	SF	eNd(0) - average from
W-2, Wenchang	-11.5643	0.716818		dtto	shaw82 & blum92
W-3, Wenchang	-11.5643	0.717082		dtto
TK-2, Penglei	-11.5643	0.71849		dtto
BL-12, Bao Loc	-11.5643	0.716507		dtto
BL-14, Bao Loc	-11.5643	0.716066		dtto
BL-20, Bao Loc	-11.5643	0.716974		dtto
2-1	-11.6	0.720206	ackerman20	MN, Laos	x-1 light layer
2-2	-11.5	0.718516		dtto	x-2 dark layer
3-1	-11.5	0.718359		dtto
3-2	-11.2	0.719274		dtto
4	-11.8	0.71883		dtto
6-1	-11.7	0.718139		dtto
6-2	-11.7	0.718794		dtto
7	-11.6	0.71775		dtto
9	-11.7	0.717865		dtto
25-1	-11.7	0.717697		dtto
25-2	-11.8	0.717361		dtto
51	-11.6	0.718698		dtto
0	-11.6	0.718569		SF, Laos
17	-11.7	0.718135		dtto
20	-11.8	0.71831		dtto
30	-11.7	0.718411		SF, China
31	-11.6	0.718218		dtto
36	-11.6	0.718449		SF, Thailand
37	-11.6	0.718132		dtto
41	-11.6	0.716825		SF, Philippines
44	-11.5	0.716361		SF, Indonesia
45	-11.5	0.716672		dtto

## Sheet: Info
This supplemental material accompanies Mizera, J., Řanda, Z., Suchý, V., Strunga, V., Klokočník, J., Kostelecký, J., Bezděk, A.,
and Moravec, Z., 2021, Parent crater for Australasian tektites beneath the sands of the Alashan Desert, Northwest China:
Best candidate ever?, in Foulger, G.R., Hamilton, L.C., Jurdy, D.M., Stein, C.A., Howard, K.A., and Stein, S., eds., In the Footsteps
of Warren B. Hamilton: New Ideas in Earth Science: Geological Society of America Special Paper 553, https://doi.org/10.1130/2021.2553(25).
